# Supplementary material for: Different brain regions support deliberation during food choice in disordered and healthy eating
Source: Research Square preprint supplement (doi:10.21203/rs.3.rs-7753169/v1), 2025-10-28
Supplement: Supplementary file 1 [file 9951ee7dfa4ef8cea4649a8a.pdf]

# Supplemental Material

## Different brain regions support deliberation during food choice in disordered and healthy eating

**Authors:** Alexandra F. Muratore<sup>1</sup>, Eileen A. Hartnett<sup>2</sup>, Karin Foerde<sup>1,3</sup>, Blair W. Uniacke<sup>1</sup>,  
B. Timothy Walsh<sup>1</sup>, Joanna Steinglass<sup>1</sup>, Daphna Shohamy<sup>2,4</sup>, Akram Bakkour<sup>2,5</sup>

### Affiliations:

<sup>1</sup>New York State Psychiatric Institute and Department of Psychiatry, Columbia University Irving Medical Center, New York, NY 10032, USA.

<sup>2</sup>Department of Psychology and Mortimer B. Zuckerman Mind Brain Behavior Institute, Columbia University, New York, NY 10027, USA.

<sup>3</sup>Department of Psychology, University of Amsterdam, Amsterdam, the Netherlands.

<sup>4</sup>The Kavli Institute for Brain Science, Columbia University, New York, NY 10027, USA.

<sup>5</sup>Department of Psychology, Institute for Mind and Biology, and Neuroscience Institute, University of Chicago, Chicago, IL 60637, USA.

**Correspondence:** [afm2166@cumc.columbia.edu](mailto:afm2166@cumc.columbia.edu) (AFM) and [bakkour@uchicago.edu](mailto:bakkour@uchicago.edu) (AB)

## I. Behavioral Analyses

**Table S1. Choice and RT during food choice task, behavioral only sample.**

| Variables                                 | Choice (Blue) |               |          | Reaction Time |               |          |
|-------------------------------------------|---------------|---------------|----------|---------------|---------------|----------|
|                                           | <i>OR</i>     | <i>95% CI</i> | <i>p</i> | $\beta$       | <i>95% CI</i> | <i>p</i> |
| Intercept                                 | 0.97          | [0.90,1.04]   | 0.34     | 1.24          | [1.18,1.29]   | <.0001   |
| $\Delta Value$                            | 3.38          | [2.87,4.01]   | <.0001   | -0.10         | [-0.12,-0.08] | <.0001   |
| Group, HC                                 | 0.93          | [0.84,1.03]   | 0.16     | -0.01         | [-0.09,0.06]  | 0.69     |
| Avg. pair value                           | 0.97          | [0.91,1.04]   | 0.42     | -0.08         | [-0.09,0.06]  | <.0001   |
| $\Delta Value$   x Group                  | 0.58          | [1.36,2.21]   | <.0001   | 0.00          | [-0.02,0.02]  | 0.97     |
| $\Delta Value$   x Avg. pair value        | 1.00          | [0.85,1.17]   | 1.00     | 0.02          | [0.00,0.04]   | 0.13     |
| Group x Avg. pair value                   | 0.97          | [0.88,1.06]   | 0.47     | 0.03          | [0.01,0.05]   | 0.00     |
| $\Delta Value$   x Group x Avg pair value | 0.83          | [0.94,1.53]   | 0.13     | -0.03         | [-0.07,0.00]  | 0.06     |

**Table S2. Choice and RT during perceptual choice task, behavioral only sample.**

| Variables                | Choice (Blue) |                |          | Reaction Time |                |          |
|--------------------------|---------------|----------------|----------|---------------|----------------|----------|
|                          | <i>OR</i>     | <i>95% CI</i>  | <i>p</i> | $\beta$       | <i>95% CI</i>  | <i>p</i> |
| Intercept                | 0.98          | [0.77,1.25]    | 0.86     | 1.10          | [1.04, 1.20]   | <.0001   |
| Color coherence          | 57.80         | [29.36,118.27] | <.0001   | -0.23         | [-0.28, -0.18] | <.0001   |
| Group, HC                | 0.82          | [0.58,1.15]    | 0.25     | -0.12         | [-0.26, 0.03]  | 0.12     |
| Color coherence  x Group | 1.16          | [0.44,3.08]    | 0.76     | 0.05          | [-0.02, 0.12]  | 0.18     |

**Figure S1. Distribution of baseline preference ratings across both groups.**

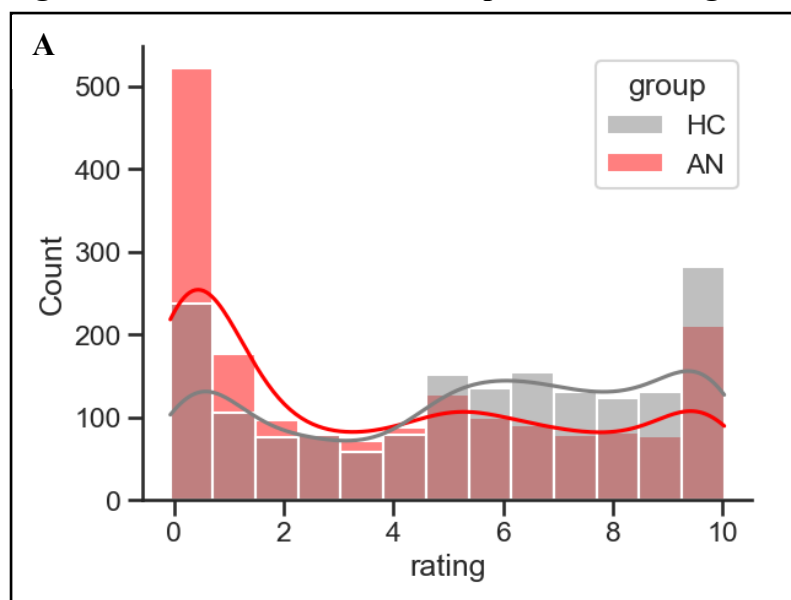

**Figure S2. Distribution of delta value across groups.**

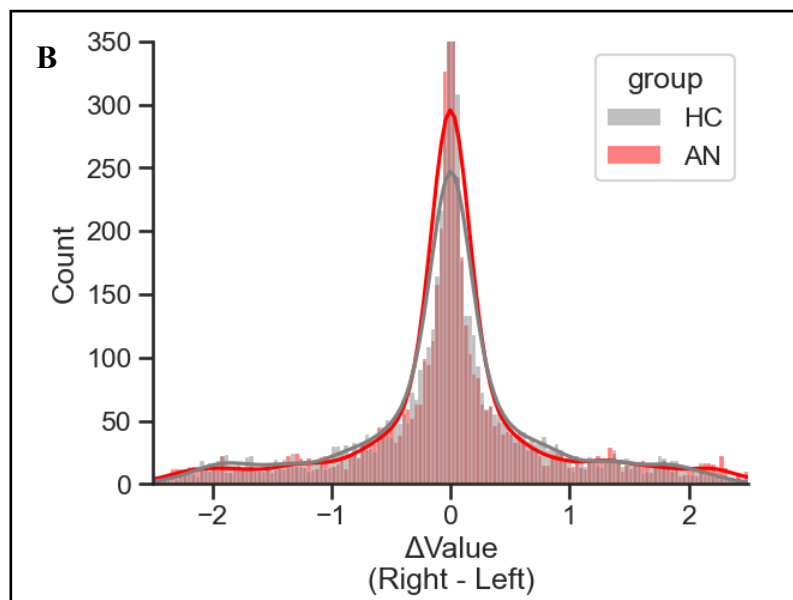

## II. Imaging Analyses

### A. Effect of mean value of food items

#### A1. Whole Brain Analysis

**Table S3. Activation table for effect of the mean value of food items in HC and patients with AN within the whole-brain.** The uncorrected map is available for HC here: <https://neurovault.org/collections/RGDXSBMN/images/803571/> and for patients here: <https://neurovault.org/collections/RGDXSBMN/images/803572/>.

| Group | Region | # Voxels | x     | y    | z   | peak Z | p     |
|-------|--------|----------|-------|------|-----|--------|-------|
| AN    | vmPFC  | 42       | -10.5 | 67.5 | 7.5 | 4.11   | 0.021 |

#### A2. Small-Volume Correction

**Table S4. Activation table for effect of the mean value of the food items in HC and patients with AN within the ventromedial prefrontal cortex.**

| Group | SVC Region | # Voxels | x    | y    | z    | peak Z | p     |
|-------|------------|----------|------|------|------|--------|-------|
| HC    | vmPFC      | 43       | -4.5 | 39.5 | -4.5 | 3.69   | 0.015 |
| AN    | vmPFC      | 52       | -6.5 | 45.5 | -8.5 | 3.49   | 0.008 |

## B. Effect of RT during value-based versus perceptual-based decisions

### B1. Whole Brain Analysis

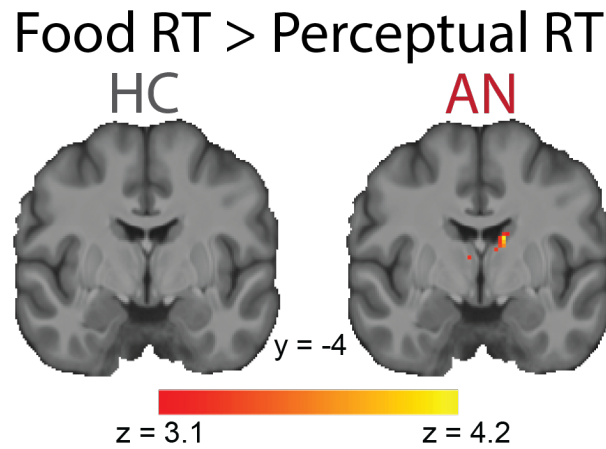

**Figure S3. Whole-Brain activation map for effect of RT during value-based vs perceptual decisions (food > perceptual) in HC and patients with AN.** The uncorrected map for HC is available here: <https://neurovault.org/collections/RGDXSBMN/images/803497/> and the uncorrected map for patients is available here: <https://neurovault.org/collections/RGDXSBMN/images/803498/>.

**Table S5. Activation table for effect of RT during value-based vs. perceptual decisions (food > dots) in HC and patients with AN.**

| Group | Region                                        | # Voxels | x     | y     | z     | peak Z | p      |
|-------|-----------------------------------------------|----------|-------|-------|-------|--------|--------|
| HC    | R Lateral Occipital Cortex                    | 99       | 31.5  | -96.5 | -0.5  | 3.84   | <.0001 |
|       | R Superior Frontal Gyrus/Middle Frontal Gyrus | 55       | 23.5  | 39.5  | 45.5  | 4.16   | 0.003  |
| AN    | L Lateral Occipital Cortex                    | 233      | -28.5 | -100  | -6.5  | 4.83   | <.0001 |
|       | R Lateral Occipital Cortex                    | 209      | 31.5  | -94.5 | -10.5 | 5.94   | <.0001 |
|       | L Caudate/Thalamus                            | 197      | -12.5 | -8.5  | 15.5  | 4.55   | <.0001 |
|       | R Cerebellum                                  | 103      | 15.5  | -84.5 | -22.5 | 5.03   | <.0001 |
|       | L Superior Frontal Gyrus                      | 96       | -8.5  | 27.5  | 39.5  | 5.02   | <.0001 |
|       | L Orbital Frontal Cortex                      | 61       | -34.5 | 35.5  | -18.5 | 4.61   | 0.002  |
|       | R Cerebellum                                  | 57       | 33.5  | -66.5 | -28.5 | 4.14   | 0.003  |
|       | L Cuneus                                      | 38       | -12.5 | -84.5 | 3.5   | 4.52   | 0.030  |
|       | L Lingual Gyrus                               | 37       | -12.5 | -76.5 | -10.5 | 3.86   | 0.034  |
|       | R Cuneus                                      | 37       | 15.5  | -84.5 | 5.5   | 4.12   | 0.034  |
|       | R Lingual Gyrus                               | 35       | 29.5  | -54.5 | -4.5  | 4.19   | 0.045  |

## B2. Small-Volume Correction

**Table S6. Activation table for effect of RT during value-based vs. perceptual decisions (food > dots) in HC and patients with AN using small-volume correction within the striatum and hippocampus, pre-registered model.**

| Group | SVC Region  | # Voxels | X     | y     | Z     | peak Z | p     |
|-------|-------------|----------|-------|-------|-------|--------|-------|
| AN    | Striatum    | 11       | -12.5 | -4.5  | 17.5  | 4.13   | 0.036 |
|       |             | 10       | 29.5  | -6.5  | 9.5   | 4.19   | 0.044 |
|       | Hippocampus | 12       | -18.5 | -10.5 | -24.5 | 4.31   | 0.016 |

## III. PPI Analysis

### A. Whole Brain Analysis

**Table S7. Activation table for whole-brain PPI analysis using dorsal striatum as a seed. The uncorrected map is available for HC here:**

<https://neurovault.org/collections/RGDXSBMN/images/803599/> and for patients here: <https://neurovault.org/collections/RGDXSBMN/images/803600/>.

| Group | Region                                    | # Voxels | x    | y    | z    | peak Z | p      |
|-------|-------------------------------------------|----------|------|------|------|--------|--------|
| AN    | Bilateral Dorsal Medial Prefrontal Cortex | 142      | -6.5 | 49.5 | 35.5 | 3.89   | <.0001 |

### B. Small-Volume Correction

**Table S8. Activation table for small-volume corrected PPI analysis using dorsal striatum as a seed and dlPFC as ROI.**

| Group | Region                                    | # Voxels | x    | y    | z   | peak Z | p    |
|-------|-------------------------------------------|----------|------|------|-----|--------|------|
| AN    | Bilateral Dorsal Medial Prefrontal Cortex | 48       | -6.5 | 63.5 | 3.5 | 4.65   | .002 |
